# Supplementary material
Source: MDPI journal article supplement (https://www.mdpi.com/2076-3417/9/24/5426)
Supplement: s1 [file s1]

## Supplementary document 1. Some photographs of the research

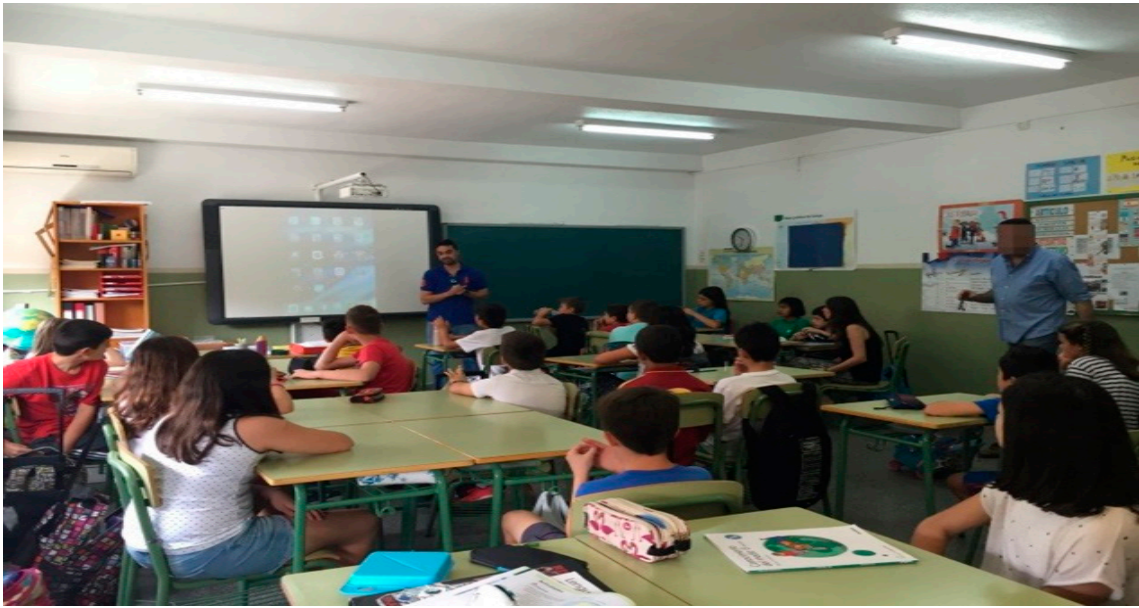

General explanation of the research

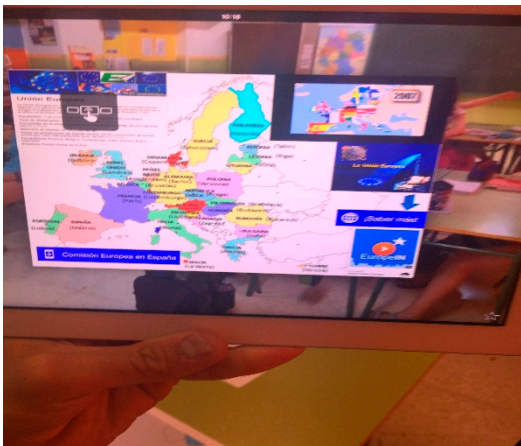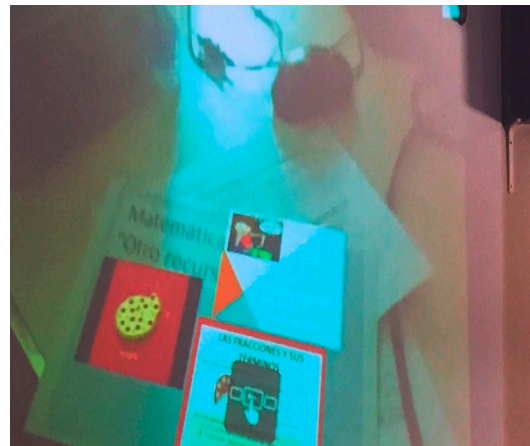

Application of augmented reality in class

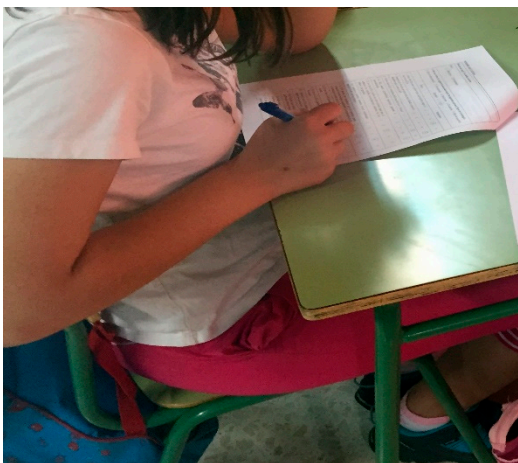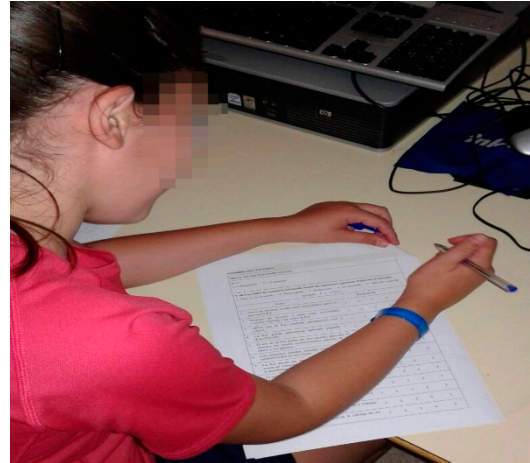

Students completing the questionnaire

## Supplementary document 2. Questionnaire PEURA-E

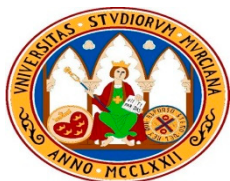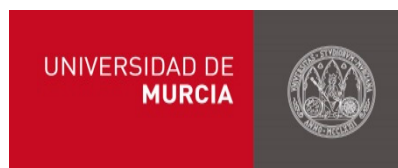

### SIXTH GRADE PRIMARY EDUCATION STUDENTS' PERCEPTION OF THE USEFULNESS OF AUGMENTED REALITY (PEURA-E)<sup>1</sup>

#### PRESENTATION

My name is Alejandro López García. I am a Primary School teacher and hold a degree in Psychopedagogy. I am currently working at the University of Murcia in the Department of Mathematics and Social Sciences Didactics. We are carrying out a research and I would, therefore, like to ask you to collaborate by answering the questions in this questionnaire.

#### AIM OF THE QUESTIONNAIRE

This questionnaire seeks to obtain information about the usefulness of Augmented Reality (AR) for teachers' teaching, students' learning and in addressing the curriculum contents in the main areas of Primary Education.

#### CONSIDERATIONS WHEN COMPLETING THE QUESTIONNAIRE

- Each item indicates how the question should be answered: marking with an X or circling the option that fits your opinion. Remember that you should only choose one option.
- You can spend as long as you need to complete the questionnaire.
- Try to be as sincere as possible in your answers.
- The data collected is confidential and anonymous, and will only be used for the research.
- You are entitled to ask for a copy of the results of this study.

**THANK YOU FOR YOUR COLLABORATION!**

---

<sup>1</sup>Final version of the questionnaire after incorporating modifications recommended by experts. This tool is adapted to the age and level maturity of the students. In the original work the extension of some items has been simplified for the sake of space.

NAME OF CENTER: \_\_\_\_\_

| Put an X in the appropriate box                                                                                                                                                                                                              |           |   |   |   |   |
|----------------------------------------------------------------------------------------------------------------------------------------------------------------------------------------------------------------------------------------------|-----------|---|---|---|---|
| Sex:<br>1. Male 2. Female                                                                                                                                                                                                                    |           |   |   |   |   |
| <p><b>Please circle the appropriate response using one of these options. There is an example.</b><br/> <i>1: Strongly disagree 2: Disagree 3: Neither disagree nor agree 4: Agree 5: Strongly agree</i><br/> <i>Example: 1 2 (3) 4 5</i></p> |           |   |   |   |   |
| Items                                                                                                                                                                                                                                        | Responses |   |   |   |   |
| 1. AR allows teaching to happen via discovery.                                                                                                                                                                                               | 1         | 2 | 3 | 4 | 5 |
| 2. AR can be another way for the teacher to teach knowledge as well as using books and note taking                                                                                                                                           | 1         | 2 | 3 | 4 | 5 |
| 3. Teachers can teach better if they also use AR in the classroom                                                                                                                                                                            | 1         | 2 | 3 | 4 | 5 |
| 4. AR can be used by teachers to build knowledge adapted to each area                                                                                                                                                                        | 1         | 2 | 3 | 4 | 5 |
| 5. AR can improve my attention in class                                                                                                                                                                                                      | 1         | 2 | 3 | 4 | 5 |
| 6. AR can increase my motivation in class                                                                                                                                                                                                    | 1         | 2 | 3 | 4 | 5 |
| 7. Working with AR helps me to understand contents better                                                                                                                                                                                    | 1         | 2 | 3 | 4 | 5 |
| 8. Activities with AR encourages me to participate more in class                                                                                                                                                                             | 1         | 2 | 3 | 4 | 5 |
| 9. Good AR use helps me to collaborate with my classmates                                                                                                                                                                                    | 1         | 2 | 3 | 4 | 5 |
| 10. AR can improve the quality of my learning and studying                                                                                                                                                                                   | 1         | 2 | 3 | 4 | 5 |
| <b>AR in Spanish Language and Literature</b>                                                                                                                                                                                                 |           |   |   |   |   |
| <p><b>Please circle the appropriate response using one of these options. There is an example.</b><br/> <i>1: Strongly disagree 2: Disagree 3: Neither disagree nor agree 4: Agree 5: Strongly agree</i><br/> <i>Example: 1 2 (3) 4 5</i></p> |           |   |   |   |   |
| Items                                                                                                                                                                                                                                        | Responses |   |   |   |   |

|                                                                                                                                                                                                                                                                              |           |   |   |   |   |
|------------------------------------------------------------------------------------------------------------------------------------------------------------------------------------------------------------------------------------------------------------------------------|-----------|---|---|---|---|
| 11. The AR activity has enabled me to distinguish between descriptive, argumentative, narrative, instructive and literary texts as reading material                                                                                                                          | 1         | 2 | 3 | 4 | 5 |
| 12. The AR activity included access to a wealth of texts to foster reading habits and comprehension, as well as activities for its evaluation                                                                                                                                | 1         | 2 | 3 | 4 | 5 |
| 13. The AR video has shown me another way to look at reading, based on journalistic and advertising texts                                                                                                                                                                    | 1         | 2 | 3 | 4 | 5 |
| 14. The AR activity has enabled me to distinguish between information, opinion and advertising concepts in journalistic and advertising texts                                                                                                                                | 1         | 2 | 3 | 4 | 5 |
| 15. The proposal has given me access to reading comprehension strategies for texts, e.g., dictionary use                                                                                                                                                                     | 1         | 2 | 3 | 4 | 5 |
| 16. Using AR to learn these types of curricular contents seems useful to me                                                                                                                                                                                                  | 1         | 2 | 3 | 4 | 5 |
| <b>AR in First Foreign Language</b>                                                                                                                                                                                                                                          |           |   |   |   |   |
| <p><b>Please circle the appropriate response using one of these options. There is an example.</b></p> <p><i>1: Strongly disagree 2: Disagree 3: Neither disagree nor agree 4: Agree 5: Strongly agree</i></p> <p style="text-align: center;"><i>Example: 1 2 (3) 4 5</i></p> |           |   |   |   |   |
| Items                                                                                                                                                                                                                                                                        | Responses |   |   |   |   |
| 17. The AR activity has allowed me to work on the subject of peace and solidarity in the world                                                                                                                                                                               | 1         | 2 | 3 | 4 | 5 |
| 18. The AR video shows simple narratives in the present and future to work on understanding                                                                                                                                                                                  | 1         | 2 | 3 | 4 | 5 |
| 19. The activity included quick strategies for understanding texts, e.g., the AR translator                                                                                                                                                                                  | 1         | 2 | 3 | 4 | 5 |
| 20. The strip of images enabled me to use AR to work on nouns, pronouns, articles and demonstratives as area contents                                                                                                                                                        | 1         | 2 | 3 | 4 | 5 |
| 21. The AR practical proposal included a blog to work with the subject through assessment activities                                                                                                                                                                         | 1         | 2 | 3 | 4 | 5 |
| 22. Using AR to learn these types of curricular contents seems useful to me                                                                                                                                                                                                  | 1         | 2 | 3 | 4 | 5 |

### AR in Social Sciences

**Please circle the appropriate response using one of these options. There is an example.**

*1: Strongly disagree 2: Disagree 3: Neither disagree nor agree 4: Agree 5: Strongly agree*

*Example: 1 2 (3) 4 5*

| Items                                                                                                                         | Responses |   |   |   |   |
|-------------------------------------------------------------------------------------------------------------------------------|-----------|---|---|---|---|
| 23. The AR activity enabled me to discover some of Spain's cultural heritage monuments                                        | 1         | 2 | 3 | 4 | 5 |
| 24. From what I saw in the video, Europe seems to be a continent with many resources                                          | 1         | 2 | 3 | 4 | 5 |
| 25. The AR activity has helped me to understand the European Union and its main aims and values                               | 1         | 2 | 3 | 4 | 5 |
| 26. The AR activity has helped me to learn the EU member countries and their capitals                                         | 1         | 2 | 3 | 4 | 5 |
| 27. The strip of images in AR showed information about EU institutions, government bodies and symbols in a more enjoyable way | 1         | 2 | 3 | 4 | 5 |
| 28. Using AR to learn these types of curricular contents seems useful to me                                                   | 1         | 2 | 3 | 4 | 5 |

### AR in Natural Sciences

**Please circle the appropriate response using one of these options. There is an example.**

*1: Strongly disagree 2: Disagree 3: Neither disagree nor agree 4: Agree 5: Strongly agree*

*Example: 1 2 (3) 4 5*

| Items                                                                                                                                               | Responses |   |   |   |   |
|-----------------------------------------------------------------------------------------------------------------------------------------------------|-----------|---|---|---|---|
| 29. The AR activity taught me about drugs and their main negative effects for health                                                                | 1         | 2 | 3 | 4 | 5 |
| 30. The AR video has dealt with decision making related to consequences of acting good or bad.                                                      | 1         | 2 | 3 | 4 | 5 |
| 31. The strip of images helped me to learn of the importance of raising awareness about alcohol, tobacco and drugs and preventing their consumption | 1         | 2 | 3 | 4 | 5 |
| 32. This AR activity showed me responsible behaviors regarding healthy life practices, diet and proper functioning of the body                      | 1         | 2 | 3 | 4 | 5 |
| 33. The AR session did not address concepts or give an explanation of harmful effects or decision making                                            | 1         | 2 | 3 | 4 | 5 |
| 34. Using AR to learn these types of curricular contents seems useful to me                                                                         | 1         | 2 | 3 | 4 | 5 |

**AR in Mathematics**

**Please circle the appropriate response using one of these options. There is an example.**

*1: Strongly disagree 2: Disagree 3: Neither disagree nor agree 4: Agree 5: Strongly agree*

*Example: 1 2 (3) 4 5*

| Items                                                                                                                                                        | Responses |   |   |   |   |
|--------------------------------------------------------------------------------------------------------------------------------------------------------------|-----------|---|---|---|---|
| 35. This AR activity has enabled me to learn about or revise fractions and their terms                                                                       | 1         | 2 | 3 | 4 | 5 |
| 36. The AR video showed me graphical representations of fractions which were easy to read and understand                                                     | 1         | 2 | 3 | 4 | 5 |
| 37. It has been explained to me, using the AR activity, how to order simple fractions, calculate the fraction of a number and work with equivalent fractions | 1         | 2 | 3 | 4 | 5 |
| 38. The AR activity has enabled me to access a variety of contents related to fractions and also some self-assessment exercises                              | 1         | 2 | 3 | 4 | 5 |
| 39. The AR session did not address concepts or give an explanation of fractions                                                                              | 1         | 2 | 3 | 4 | 5 |
| 40. Using AR to learn these types of curricular contents seems useful to me                                                                                  | 1         | 2 | 3 | 4 | 5 |

Observations:

---

---

---

---

---

---

---

---

### Supplementary document 3. Scale for experts to evaluate content

#### EVALUATION SCALE <sup>2</sup>

| <b>Presentation</b> of the Questionnaire:                    |   |   |   |   |
|--------------------------------------------------------------|---|---|---|---|
| 1. The aim of the research is stated                         | 1 | 2 | 3 | 4 |
| 2. The authorship of the research is stated                  | 1 | 2 | 3 | 4 |
| 3. The target participant is requested to collaborate        | 1 | 2 | 3 | 4 |
| 4. The importance of the research is explained               | 1 | 2 | 3 | 4 |
| 5. The target participant is encouraged to collaborate       | 1 | 2 | 3 | 4 |
| 6. The target participant is thanked for their collaboration | 1 | 2 | 3 | 4 |
| 7. Anonymity and confidentiality are guaranteed              | 1 | 2 | 3 | 4 |

| <b>Instructions</b> in the Questionnaire:                              |   |   |   |   |
|------------------------------------------------------------------------|---|---|---|---|
| 8. The instructions are clear and concise                              | 1 | 2 | 3 | 4 |
| 9. The target participant is requested to be respond sincerely         | 1 | 2 | 3 | 4 |
| 10. The target participant is encouraged to ask for help when in doubt | 1 | 2 | 3 | 4 |

| <b>Overall Structure and Design</b> of the Questionnaire:                                                                               |   |   |   |   |
|-----------------------------------------------------------------------------------------------------------------------------------------|---|---|---|---|
| 11. The number of questions is NOT excessive                                                                                            | 1 | 2 | 3 | 4 |
| 12. The questions are straightforward to answer                                                                                         | 1 | 2 | 3 | 4 |
| 13. The order of the questions is appropriate                                                                                           | 1 | 2 | 3 | 4 |
| 14. The questionnaire is internally coherent                                                                                            | 1 | 2 | 3 | 4 |
| 15. The questions are relevant to the aim of the research                                                                               | 1 | 2 | 3 | 4 |
| 16. The questionnaire clearly reflects the research variables                                                                           | 1 | 2 | 3 | 4 |
| 17. The variables are clearly coded                                                                                                     | 1 | 2 | 3 | 4 |
| 18. A blank space is included in the questionnaire for respondents to make any observations or clarifications they consider appropriate | 1 | 2 | 3 | 4 |
| 19. The identification data are appropriate (sex, level of education ...)                                                               | 1 | 2 | 3 | 4 |
| 20. The identification data appear in the most suitable position                                                                        | 1 | 2 | 3 | 4 |

Next we would ask you to rate two aspects of each of the questions in the questionnaire (enumerated in the central column):

- On the left, the **Appropriateness of the wording** used, given the characteristics of the target population.
- On the right, the **Appropriateness of the response options**; i.e., the appropriate number of options, their relevance to the question and the representativeness of the variability of the options.

---

<sup>2</sup>The creator of this scale is Professor Francisca José Serrano Pastor (2008), from the Department of Methods of Research and Diagnosis in Education of the University of Murcia (Spain). E-mail: [fjserran@um.es](mailto:fjserran@um.es).



| <i>Appropriateness of the wording</i> |   |   |   | <b>Question</b> | <i>Appropriateness of the response options</i> |   |   |   |
|---------------------------------------|---|---|---|-----------------|------------------------------------------------|---|---|---|
| 4                                     | 3 | 2 | 1 | <b>1</b>        | 1                                              | 2 | 3 | 4 |
| 4                                     | 3 | 2 | 1 | <b>2</b>        | 1                                              | 2 | 3 | 4 |
| 4                                     | 3 | 2 | 1 | <b>3</b>        | 1                                              | 2 | 3 | 4 |
| 4                                     | 3 | 2 | 1 | <b>4</b>        | 1                                              | 2 | 3 | 4 |
| 4                                     | 3 | 2 | 1 | <b>5</b>        | 1                                              | 2 | 3 | 4 |
| 4                                     | 3 | 2 | 1 | <b>6</b>        | 1                                              | 2 | 3 | 4 |
| 4                                     | 3 | 2 | 1 | <b>7</b>        | 1                                              | 2 | 3 | 4 |
| 4                                     | 3 | 2 | 1 | <b>8</b>        | 1                                              | 2 | 3 | 4 |
| 4                                     | 3 | 2 | 1 | <b>9</b>        | 1                                              | 2 | 3 | 4 |
| 4                                     | 3 | 2 | 1 | <b>10</b>       | 1                                              | 2 | 3 | 4 |
| 4                                     | 3 | 2 | 1 | <b>11</b>       | 1                                              | 2 | 3 | 4 |
| 4                                     | 3 | 2 | 1 | <b>12</b>       | 1                                              | 2 | 3 | 4 |
| 4                                     | 3 | 2 | 1 | <b>13</b>       | 1                                              | 2 | 3 | 4 |
| 4                                     | 3 | 2 | 1 | <b>14</b>       | 1                                              | 2 | 3 | 4 |
| 4                                     | 3 | 2 | 1 | <b>15</b>       | 1                                              | 2 | 3 | 4 |

Lastly, we would ask you to do an **Overall Evaluation of the Appropriateness** of the three aspects of the questionnaire listed below:

|                                                    |   |   |   |   |
|----------------------------------------------------|---|---|---|---|
| 21. The research problem                           | 1 | 2 | 3 | 4 |
| 22. The methodological aspects of its design       | 1 | 2 | 3 | 4 |
| 23. The characteristics of the target participants | 1 | 2 | 3 | 4 |

ANY FURTHER OBSERVATIONS, CLARIFICATIONS AND EVALUATIONS:

**THANK YOU FOR YOUR COLLABORATION!**



## Supplementary document 4. Evaluation of the contents by experts

| Dimensions per blocks                                                                                                                               | Mean        |
|-----------------------------------------------------------------------------------------------------------------------------------------------------|-------------|
| <b>Presentation of the Questionnaire:</b>                                                                                                           |             |
| 1. The aim of the research is stated                                                                                                                | 4.00        |
| 2. The authorship of the research is stated                                                                                                         | 4.00        |
| 3. The target participant is requested to collaborate                                                                                               | 3.67        |
| 4. The importance of the research is explained                                                                                                      | 4.00        |
| 5. The target participant is encouraged to collaborate                                                                                              | 3.33        |
| 6. The target participant is thanked for their collaboration                                                                                        | 3.33        |
| 7. Anonymity and confidentiality are guaranteed                                                                                                     | 3.67        |
| <b>Total</b>                                                                                                                                        | <b>3.71</b> |
| <b>Instructions in the Questionnaire</b>                                                                                                            |             |
| 8. These are clear and concise                                                                                                                      | 3.00        |
| 9. The target participant is requested to be respond sincerely                                                                                      | 3.33        |
| 10. The target participant is encouraged to ask for help when in doubt                                                                              | 3.33        |
| <b>Total</b>                                                                                                                                        | <b>3.22</b> |
| <b>Overall Structure and Design of the Questionnaire:</b>                                                                                           |             |
| 11. The number of questions is NOT excessive                                                                                                        | 3.33        |
| 12. The questions are straightforward to answer                                                                                                     | 3.33        |
| 13. The order of the questions is appropriate                                                                                                       | 3.33        |
| 14. The questionnaire is internally coherent                                                                                                        | 3.33        |
| 15. The questions are relevant to the aim of the research                                                                                           | 3.67        |
| 16. The questionnaire clearly reflects the research variables                                                                                       | 3.67        |
| 17. The variables are clearly coded                                                                                                                 | 3.33        |
| 18. A blank space is included in the questionnaire for respondents to make any observations or clarifications they consider appropriate             | 4.00        |
| 19. The identification data are appropriate (sex, level of education ...)                                                                           | 4.00        |
| 20. The identification data appear in the most suitable position                                                                                    | 3.67        |
| <b>Total</b>                                                                                                                                        | <b>3.57</b> |
| <b>Appropriateness of the wording</b>                                                                                                               |             |
| Items                                                                                                                                               |             |
| 1. AR allows teaching to happen via discovery                                                                                                       | 4.00        |
| 2. AR can be another way for the teacher to teach knowledge as well as using books and note taking                                                  | 4.00        |
| 3. Teachers can teach better if they also use AR in the classroom                                                                                   | 4.00        |
| 4. AR can be used by teachers to build knowledge adapted to each area                                                                               | 4.00        |
| 5. AR can increase students' attention                                                                                                              | 4.00        |
| 6. AR can increase students' motivation                                                                                                             | 4.00        |
| 7. AR helps students to understand the contents better                                                                                              | 4.00        |
| 8. Activities using AR encourage students to participate more in class                                                                              | 4.00        |
| 9. AR can help students to work in collaboration                                                                                                    | 4.00        |
| 10. AR can improve the quality of students' learning and studying                                                                                   | 4.00        |
| 11. The AR activity has enabled me to distinguish between descriptive, argumentative, narrative, instructive and literary texts as reading material | 4.00        |
| 12. The AR activity included access to a wealth of texts to foster reading habits and comprehension, as well as activities for its evaluation       | 4.00        |
| 13. The AR video has shown me another way to look at reading, based on journalistic and advertising texts                                           | 4.00        |
| 14. The AR activity has enabled me to distinguish between information, opinion and advertising concepts in journalistic and advertising texts       | 4.00        |

|     |                                                                                                                                                          |             |
|-----|----------------------------------------------------------------------------------------------------------------------------------------------------------|-------------|
| 15. | The proposal has given me access to reading comprehension strategies for texts, e.g., dictionary use                                                     | 3.67        |
| 16. | Using AR to learn these types of curricular contents seems useful to me                                                                                  | 4.00        |
| 17. | The AR activity has allowed me to work on the subject of peace and solidarity in the world                                                               | 4.00        |
| 18. | The AR video shows simple narratives in the present and future to work on understanding                                                                  | 3.67        |
| 19. | The activity included quick strategies for understanding texts, e.g., the AR translator                                                                  | 4.00        |
| 20. | The strip of images enabled me to use AR to work on nouns, pronouns, articles and demonstratives as area contents                                        | 4.00        |
| 21. | The AR practical proposal included a blog to work with the subject through assessment activities                                                         | 4.00        |
| 22. | Using AR to learn these types of curricular contents seems useful to me                                                                                  | 4.00        |
| 23. | The AR activity enabled me to discover some of Spain's cultural heritage monuments                                                                       | 3.67        |
| 24. | From what I saw in the video, Europe seems to be a continent with many resources                                                                         | 4.00        |
| 25. | The AR activity has helped me to understand the European Union and its main aims and values                                                              | 3.67        |
| 26. | The AR activity has helped me to learn the EU member countries and their capitals                                                                        | 4.00        |
| 27. | The strip of images in AR showed information about EU institutions, government bodies and symbols in a more enjoyable way                                | 4.00        |
| 28. | Using AR to learn these types of curricular contents seems useful to me                                                                                  | 4.00        |
| 29. | The AR activity taught me about drugs and their main negative effects for health                                                                         | 4.00        |
| 30. | The AR video has dealt with decision making related to consequences of acting good or bad                                                                | 4.00        |
| 31. | The strip of images helped me to learn of the importance of raising awareness about alcohol, tobacco and drugs and preventing their consumption          | 4.00        |
| 32. | This AR activity showed me responsible behaviors regarding healthy life practices, diet and proper functioning of the body                               | 4.00        |
| 33. | The AR session did not address concepts or give an explanation of harmful effects or decision making                                                     | 4.00        |
| 34. | Using AR to learn these types of curricular contents seems useful to me                                                                                  | 4.00        |
| 35. | This AR activity has enabled me to learn about or revise fractions and their terms                                                                       | 4.00        |
| 36. | The AR video showed me graphical representations of fractions which were easy to read and understand                                                     | 3.67        |
| 37. | It has been explained to me, using the AR activity, how to order simple fractions, calculate the fraction of a number and work with equivalent fractions | 4.00        |
| 38. | The AR activity has enabled me to access a variety of contents related to fractions and also some self-assessment exercises                              | 4.00        |
| 39. | The AR session did not address concepts or give an explanation of fractions                                                                              | 4.00        |
| 40. | Using AR to learn these types of curricular contents seems useful to me                                                                                  | 4.00        |
|     | <b>Total</b>                                                                                                                                             | <b>3.96</b> |

### Appropriateness of the response options

|       |                                                                                                 |      |
|-------|-------------------------------------------------------------------------------------------------|------|
| Items |                                                                                                 |      |
| 1.    | AR allows teaching to happen via discovery                                                      | 4.00 |
| 2.    | AR can be another way for the teacher to teach knowledge as well as using books and note taking | 4.00 |
| 3.    | Teachers can teach better if they also use AR in the classroom                                  | 4.00 |
| 4.    | AR can be used by teachers to build knowledge adapted to each area                              | 4.00 |
| 5.    | AR can increase students' attention                                                             | 4.00 |
| 6.    | AR can increase students' motivation                                                            | 4.00 |
| 7.    | AR helps students to understand the contents better                                             | 4.00 |
| 8.    | Activities using AR encourage students to participate more in class                             | 4.00 |
| 9.    | AR can help students to work in collaboration                                                   | 4.00 |
| 10.   | AR can improve the quality of students' learning and studying                                   | 4.00 |

|                                                                                                                                                              |             |
|--------------------------------------------------------------------------------------------------------------------------------------------------------------|-------------|
| 11. The AR activity has enabled me to distinguish between descriptive, argumentative, narrative, instructive and literary texts as reading material          | 4.00        |
| 12. The AR activity included access to a wealth of texts to foster reading habits and comprehension, as well as activities for its evaluation                | 4.00        |
| 13. The AR video has shown me another way to look at reading, based on journalistic and advertising texts                                                    | 4.00        |
| 14. The AR activity has enabled me to distinguish between information, opinion and advertising concepts in journalistic and advertising texts                | 4.00        |
| 15. The proposal has given me access to reading comprehension strategies for texts, e.g., dictionary use                                                     | 4.00        |
| 16. Using AR to learn these types of curricular contents seems useful to me                                                                                  | 4.00        |
| 17. The AR activity has allowed me to work on the subject of peace and solidarity in the world                                                               | 4.00        |
| 18. The AR video shows simple narratives in the present and future to work on understanding                                                                  | 4.00        |
| 19. The activity included quick strategies for understanding texts, e.g., the AR translator                                                                  | 4.00        |
| 20. The strip of images enabled me to use AR to work on nouns, pronouns, articles and demonstratives as area contents                                        | 4.00        |
| 21. The AR practical proposal included a blog to work with the subject through assessment activities                                                         | 4.00        |
| 22. Using AR to learn these types of curricular contents seems useful to me                                                                                  | 4.00        |
| 23. The AR activity enabled me to discover some of Spain's cultural heritage monuments                                                                       | 4.00        |
| 24. From what I saw in the video, Europe seems to be a continent with many resources                                                                         | 4.00        |
| 25. The AR activity has helped me to understand the European Union and its main aims and values                                                              | 4.00        |
| 26. The AR activity has helped me to learn the EU member countries and their capitals                                                                        | 4.00        |
| 27. The strip of images in AR showed information about EU institutions, government bodies and symbols in a more enjoyable way                                | 4.00        |
| 28. Using AR to learn these types of curricular contents seems useful to me                                                                                  | 4.00        |
| 29. The AR activity taught me about drugs and their main negative effects for health                                                                         | 4.00        |
| 30. The AR video has dealt with decision making related to consequences of acting good or bad                                                                | 4.00        |
| 31. The strip of images helped me to learn of the importance of raising awareness about alcohol, tobacco and drugs and preventing their consumption          | 4.00        |
| 32. This AR activity showed me responsible behaviors regarding healthy life practices, diet and proper functioning of the body                               | 4.00        |
| 33. The AR session did not address concepts or give an explanation of harmful effects or decision making                                                     | 4.00        |
| 34. Using AR to learn these types of curricular contents seems useful to me                                                                                  | 4.00        |
| 35. This AR activity has enabled me to learn about or revise fractions and their terms                                                                       | 4.00        |
| 36. The AR video showed me graphical representations of fractions which were easy to read and understand                                                     | 4.00        |
| 37. It has been explained to me, using the AR activity, how to order simple fractions, calculate the fraction of a number and work with equivalent fractions | 4.00        |
| 38. The AR activity has enabled me to access a variety of contents related to fractions and also some self-assessment exercises                              | 4.00        |
| 39. The AR session did not address concepts or give an explanation of fractions                                                                              | 4.00        |
| 40. Using AR to learn these types of curricular contents seems useful to me                                                                                  | 4.00        |
| <b>Total</b>                                                                                                                                                 | <b>4.00</b> |
| <b>Overall Evaluation of the Appropriateness of the three aspects of the questionnaire listed below:</b>                                                     |             |
| 21. The research problem                                                                                                                                     | 4.00        |
| 22. The methodological aspects of its design                                                                                                                 | 4.00        |
| 23. The characteristics of the target participants                                                                                                           | 3.67        |
| <b>Total</b>                                                                                                                                                 | <b>3.89</b> |

## Supplementary document 5. Evaluation of the usefulness of AR by students.

### 5.A. Evaluation of the usefulness of AR globally.

| Overall                                                                                                                                             | Total | Strongly disagree | Disagree | Neither disagree nor agree | Agree | Strongly agree | Md.  | M    | Sd.   |
|-----------------------------------------------------------------------------------------------------------------------------------------------------|-------|-------------------|----------|----------------------------|-------|----------------|------|------|-------|
| Teaching                                                                                                                                            |       |                   |          |                            |       |                |      |      |       |
| 1. AR allows teaching to happen via discovery                                                                                                       |       |                   |          |                            |       |                |      |      |       |
| Frq.                                                                                                                                                | 106   | 3                 | 3        | 8                          | 29    | 63             | 5.00 | 4.38 | .951  |
| %                                                                                                                                                   | 100   | 2.8               | 2.8      | 7.5                        | 27.4  | 59.4           |      |      |       |
| 2. AR can be another way for the teacher to teach knowledge as well as using books and note taking                                                  |       |                   |          |                            |       |                |      |      |       |
| Frq.                                                                                                                                                | 106   | 1                 | 0        | 9                          | 31    | 65             | 5.00 | 4.50 | .734  |
| %                                                                                                                                                   | 100   | .9                | 0        | 8.5                        | 29.2  | 61.3           |      |      |       |
| 3. Teachers can teach better if they also use AR in the classroom                                                                                   |       |                   |          |                            |       |                |      |      |       |
| Frq.                                                                                                                                                | 106   | 3                 | 5        | 11                         | 48    | 39             | 4.00 | 4.08 | .957  |
| %                                                                                                                                                   | 100   | 2.8               | 4.7      | 10.4                       | 45.3  | 36.8           |      |      |       |
| 4. AR can be used by teachers to build knowledge adapted to each area                                                                               |       |                   |          |                            |       |                |      |      |       |
| Frq.                                                                                                                                                | 106   | 2                 | 1        | 13                         | 38    | 52             | 4.00 | 4.29 | .862  |
| %                                                                                                                                                   | 100   | 1.9               | .9       | 12.3                       | 35.8  | 49.1           |      |      |       |
| Learning                                                                                                                                            |       |                   |          |                            |       |                |      |      |       |
| 5. AR can increase students' attention                                                                                                              |       |                   |          |                            |       |                |      |      |       |
| Frq.                                                                                                                                                | 106   | 5                 | 2        | 12                         | 39    | 48             | 4.00 | 4.16 | 1.025 |
| %                                                                                                                                                   | 100   | 4.7               | 1.9      | 11.3                       | 36.8  | 45.3           |      |      |       |
| 6. AR can increase students' motivation                                                                                                             |       |                   |          |                            |       |                |      |      |       |
| Frq.                                                                                                                                                | 106   | 4                 | 6        | 8                          | 30    | 58             | 5.00 | 4.25 | 1.067 |
| %                                                                                                                                                   | 100   | 3.8               | 5.7      | 7.5                        | 28.3  | 54.7           |      |      |       |
| 7. AR helps students to understand the contents better                                                                                              |       |                   |          |                            |       |                |      |      |       |
| Frq.                                                                                                                                                | 106   | 4                 | 8        | 13                         | 38    | 43             | 4.00 | 4.02 | 1.087 |
| %                                                                                                                                                   | 100   | 3.8               | 7.5      | 12.3                       | 35.8  | 40.6           |      |      |       |
| 8. Activities using AR encourage students to participate more in class                                                                              |       |                   |          |                            |       |                |      |      |       |
| Frq.                                                                                                                                                | 106   | 6                 | 6        | 12                         | 43    | 39             | 4.00 | 3.97 | 1.108 |
| %                                                                                                                                                   | 100   | 5.7               | 5.7      | 11.3                       | 40.6  | 36.8           |      |      |       |
| 9. AR can help students to work in collaboration                                                                                                    |       |                   |          |                            |       |                |      |      |       |
| Frq.                                                                                                                                                | 106   | 0                 | 4        | 20                         | 42    | 40             | 4.00 | 4.11 | .843  |
| %                                                                                                                                                   | 100   | 0                 | 3.8      | 18.9                       | 39.6  | 37.7           |      |      |       |
| 10. AR can improve the quality of students' learning and studying                                                                                   |       |                   |          |                            |       |                |      |      |       |
| Frq.                                                                                                                                                | 106   | 4                 | 3        | 18                         | 32    | 49             | 4.00 | 4.12 | 1.039 |
| %                                                                                                                                                   | 100   | 3.8               | 2.8      | 17.0                       | 30.2  | 46.2           |      |      |       |
| Spanish Language and Literature                                                                                                                     |       |                   |          |                            |       |                |      |      |       |
| 11. The AR activity has enabled me to distinguish between descriptive, argumentative, narrative, instructive and literary texts as reading material |       |                   |          |                            |       |                |      |      |       |
| Frq.                                                                                                                                                | 106   | 1                 | 2        | 21                         | 51    | 31             | 4.00 | 4.03 | .810  |
| %                                                                                                                                                   | 100   | .9                | 1.9      | 19.8                       | 48.1  | 29.2           |      |      |       |
| 12. The AR activity included access to a wealth of texts to foster reading habits and comprehension, as well as activities for its evaluation       |       |                   |          |                            |       |                |      |      |       |
| Frq.                                                                                                                                                | 106   | 0                 | 1        | 11                         | 53    | 41             | 4.00 | 4.26 | .680  |
| %                                                                                                                                                   | 100   | 0                 | .9       | 10.4                       | 50.0  | 38.7           |      |      |       |
| 13. The AR video has shown me another way to look at reading, based on journalistic and advertising texts                                           |       |                   |          |                            |       |                |      |      |       |
| Frq.                                                                                                                                                | 106   | 1                 | 2        | 13                         | 42    | 48             | 4.00 | 4.26 | .820  |
| %                                                                                                                                                   | 100   | .9                | 1.9      | 12.3                       | 39.6  | 45.3           |      |      |       |
| 14. The AR activity has enabled me to distinguish between information, opinion and advertising concepts in journalistic and advertising texts       |       |                   |          |                            |       |                |      |      |       |
| Frq.                                                                                                                                                | 106   | 2                 | 5        | 21                         | 42    | 36             | 4.00 | 3.99 | .951  |
| %                                                                                                                                                   | 100   | 1.9               | 4.7      | 19.8                       | 39.6  | 34.0           |      |      |       |
| 15. The proposal has given me access to reading comprehension strategies for texts, e.g., dictionary use                                            |       |                   |          |                            |       |                |      |      |       |
| Frq.                                                                                                                                                | 106   | 3                 | 6        | 12                         | 41    | 44             | 4.00 | 4.10 | 1.004 |
| %                                                                                                                                                   | 100   | 2.8               | 5.7      | 11.3                       | 38.7  | 41.5           |      |      |       |
| 16. Using AR to learn these types of curricular contents seems useful to me                                                                         |       |                   |          |                            |       |                |      |      |       |
| Frq.                                                                                                                                                | 106   | 0                 | 3        | 11                         | 27    | 65             | 5.00 | 4.45 | .794  |
| %                                                                                                                                                   | 100   | 0                 | 2.8      | 10.4                       | 25.5  | 61.3           |      |      |       |
| First Foreign Language                                                                                                                              |       |                   |          |                            |       |                |      |      |       |
| 17. The AR activity has allowed me to work on the subject of peace and solidarity in the world                                                      |       |                   |          |                            |       |                |      |      |       |
| Frq.                                                                                                                                                | 106   | 2                 | 4        | 20                         | 39    | 41             | 4.00 | 4.07 | .949  |
| %                                                                                                                                                   | 100   | 1.9               | 3.8      | 18.9                       | 36.8  | 38.7           |      |      |       |
| 18. The AR video shows simple narratives in the present and future to work on understanding                                                         |       |                   |          |                            |       |                |      |      |       |
| Frq.                                                                                                                                                | 106   | 0                 | 2        | 13                         | 49    | 42             | 4.00 | 4.24 | .737  |
| %                                                                                                                                                   | 100   | 0                 | 1.9      | 12.3                       | 46.2  | 39.6           |      |      |       |

|      |                                                                                                                   |     |     |      |      |      |      |      |       |  |
|------|-------------------------------------------------------------------------------------------------------------------|-----|-----|------|------|------|------|------|-------|--|
| 19.  | The activity included quick strategies for understanding texts, e.g., the AR translator                           |     |     |      |      |      |      |      |       |  |
| Frq. | 106                                                                                                               | 0   | 2   | 11   | 37   | 56   | 5.00 | 4.39 | .751  |  |
| %    | 100                                                                                                               | 0   | 1.9 | 10.4 | 34.9 | 52.8 |      |      |       |  |
| 20.  | The strip of images enabled me to use AR to work on nouns, pronouns, articles and demonstratives as area contents |     |     |      |      |      |      |      |       |  |
| Frq. | 106                                                                                                               | 5   | 5   | 23   | 32   | 41   | 4.00 | 3.93 | 1.106 |  |
| %    | 100                                                                                                               | 4.7 | 4.7 | 21.7 | 30.2 | 38.7 |      |      |       |  |
| 21.  | The AR practical proposal included a blog to work with the subject through assessment activities                  |     |     |      |      |      |      |      |       |  |
| Frq. | 106                                                                                                               | 1   | 5   | 19   | 42   | 39   | 4.00 | 4.07 | .908  |  |
| %    | 100                                                                                                               | .9  | 4.7 | 17.9 | 39.6 | 36.8 |      |      |       |  |
| 22.  | Using AR to learn these types of curricular contents seems useful to me                                           |     |     |      |      |      |      |      |       |  |
| Frq. | 106                                                                                                               | 1   | 4   | 11   | 31   | 59   | 5.00 | 4.35 | .884  |  |
| %    | 100                                                                                                               | .9  | 3.8 | 10.4 | 29.2 | 55.7 |      |      |       |  |

#### Social Sciences

|      |                                                                                                                           |     |     |      |      |      |      |      |      |  |
|------|---------------------------------------------------------------------------------------------------------------------------|-----|-----|------|------|------|------|------|------|--|
| 23.  | The AR activity enabled me to discover some of Spain's cultural heritage monuments                                        |     |     |      |      |      |      |      |      |  |
| Frq. | 106                                                                                                                       | 0   | 2   | 3    | 26   | 75   | 5.00 | 4.64 | .635 |  |
| %    | 100                                                                                                                       | 0   | 1.9 | 2.8  | 24.5 | 70.8 |      |      |      |  |
| 24.  | From what I saw in the video, Europe seems to be a continent with many resources                                          |     |     |      |      |      |      |      |      |  |
| Frq. | 106                                                                                                                       | 2   | 6   | 12   | 43   | 43   | 4.00 | 4.12 | .953 |  |
| %    | 100                                                                                                                       | 1.9 | 5.7 | 11.3 | 40.6 | 40.6 |      |      |      |  |
| 25.  | The AR activity has helped me to understand the European Union and its main aims and values                               |     |     |      |      |      |      |      |      |  |
| Frq. | 106                                                                                                                       | 2   | 1   | 23   | 36   | 44   | 4.00 | 4.12 | .912 |  |
| %    | 100                                                                                                                       | 1.9 | .9  | 21.7 | 34.0 | 41.5 |      |      |      |  |
| 26.  | The AR activity has helped me to learn the EU member countries and their capitals                                         |     |     |      |      |      |      |      |      |  |
| Frq. | 106                                                                                                                       | 3   | 4   | 12   | 37   | 50   | 4.00 | 4.20 | .980 |  |
| %    | 100                                                                                                                       | 2.8 | 3.8 | 11.3 | 34.9 | 47.2 |      |      |      |  |
| 27.  | The strip of images in AR showed information about EU institutions, government bodies and symbols in a more enjoyable way |     |     |      |      |      |      |      |      |  |
| Frq. | 106                                                                                                                       | 1   | 8   | 12   | 36   | 49   | 4.00 | 4.17 | .971 |  |
| %    | 100                                                                                                                       | .9  | 7.5 | 11.3 | 34.0 | 46.2 |      |      |      |  |
| 28.  | Using AR to learn these types of curricular contents seems useful to me                                                   |     |     |      |      |      |      |      |      |  |
| Frq. | 106                                                                                                                       | 2   | 4   | 11   | 28   | 61   | 5.00 | 4.34 | .945 |  |
| %    | 100                                                                                                                       | 1.9 | 3.8 | 10.4 | 26.4 | 57.5 |      |      |      |  |

#### Natural Sciences

|      |                                                                                                                                                 |      |     |      |      |      |      |      |      |  |
|------|-------------------------------------------------------------------------------------------------------------------------------------------------|------|-----|------|------|------|------|------|------|--|
| 29.  | The AR activity taught me about drugs and their main negative effects for health                                                                |      |     |      |      |      |      |      |      |  |
| Frq. | 106                                                                                                                                             | 1    | 1   | 14   | 17   | 73   | 5.00 | 4.51 | .831 |  |
| %    | 100                                                                                                                                             | .9   | .9  | 13.2 | 16.0 | 68.9 |      |      |      |  |
| 30.  | The AR video has dealt with decision making related to consequences of acting good or bad                                                       |      |     |      |      |      |      |      |      |  |
| Frq. | 106                                                                                                                                             | 1    | 2   | 8    | 28   | 67   | 5.00 | 4.49 | .796 |  |
| %    | 100                                                                                                                                             | .9   | 1.9 | 7.5  | 26.4 | 63.2 |      |      |      |  |
| 31.  | The strip of images helped me to learn of the importance of raising awareness about alcohol, tobacco and drugs and preventing their consumption |      |     |      |      |      |      |      |      |  |
| Frq. | 106                                                                                                                                             | 0    | 3   | 8    | 33   | 62   | 5.00 | 4.45 | .758 |  |
| %    | 100                                                                                                                                             | 0    | 2.8 | 7.5  | 31.1 | 58.5 |      |      |      |  |
| 32.  | This AR activity showed me responsible behaviors regarding healthy life practices, diet and proper functioning of the body                      |      |     |      |      |      |      |      |      |  |
| Frq. | 106                                                                                                                                             | 0    | 1   | 9    | 35   | 61   | 5.00 | 4.47 | .693 |  |
| %    | 100                                                                                                                                             | 0    | .9  | 8.5  | 33.0 | 57.5 |      |      |      |  |
| 33.  | The AR session did not address concepts or give an explanation of harmful effects or decision making                                            |      |     |      |      |      |      |      |      |  |
| Frq. | 106                                                                                                                                             | 92   | 10  | 4    | 0    | 0    | 1.00 | 1.17 | .467 |  |
| %    | 100                                                                                                                                             | 86.8 | 9.4 | 3.8  | 0    | 0    |      |      |      |  |
| 34.  | Using AR to learn these types of curricular contents seems useful to me                                                                         |      |     |      |      |      |      |      |      |  |
| Frq. | 106                                                                                                                                             | 1    | 1   | 3    | 25   | 76   | 5.00 | 4.64 | .679 |  |
| %    | 100                                                                                                                                             | .9   | .9  | 2.8  | 23.6 | 71.7 |      |      |      |  |

#### Mathematics

|      |                                                                                                                                                          |      |     |      |      |      |      |      |      |  |
|------|----------------------------------------------------------------------------------------------------------------------------------------------------------|------|-----|------|------|------|------|------|------|--|
| 35.  | This AR activity has enabled me to learn about or revise fractions and their terms                                                                       |      |     |      |      |      |      |      |      |  |
| Frq. | 106                                                                                                                                                      | 2    | 2   | 11   | 32   | 59   | 5.00 | 4.36 | .886 |  |
| %    | 100                                                                                                                                                      | 1.9  | 1.9 | 10.4 | 30.2 | 55.7 |      |      |      |  |
| 36.  | The AR video showed me graphical representations of fractions which were easy to read and understand                                                     |      |     |      |      |      |      |      |      |  |
| Frq. | 106                                                                                                                                                      | 0    | 2   | 5    | 37   | 62   | 5.00 | 4.50 | .680 |  |
| %    | 100                                                                                                                                                      | 0    | 1.9 | 4.7  | 34.9 | 58.5 |      |      |      |  |
| 37.  | It has been explained to me, using the AR activity, how to order simple fractions, calculate the fraction of a number and work with equivalent fractions |      |     |      |      |      |      |      |      |  |
| Frq. | 106                                                                                                                                                      | 4    | 2   | 8    | 39   | 53   | 4.50 | 4.27 | .961 |  |
| %    | 100                                                                                                                                                      | 3.8  | 1.9 | 7.5  | 36.8 | 50.0 |      |      |      |  |
| 38.  | The AR activity has enabled me to access a variety of contents related to fractions and also some self-assessment exercises                              |      |     |      |      |      |      |      |      |  |
| Frq. | 106                                                                                                                                                      | 0    | 3   | 7    | 32   | 64   | 5.00 | 4.48 | .746 |  |
| %    | 100                                                                                                                                                      | 0    | 2.8 | 6.6  | 30.2 | 60.4 |      |      |      |  |
| 39.  | The AR session did not address concepts or give an explanation of fractions                                                                              |      |     |      |      |      |      |      |      |  |
| Frq. | 106                                                                                                                                                      | 98   | 8   | 0    | 0    | 0    | 1.00 | 1.08 | .265 |  |
| %    | 100                                                                                                                                                      | 92.5 | 7.5 | 0    | 0    | 0    |      |      |      |  |
| 40.  | Using AR to learn these types of curricular contents seems useful to me                                                                                  |      |     |      |      |      |      |      |      |  |
| Frq. | 106                                                                                                                                                      | 1    | 4   | 7    | 29   | 65   | 5.00 | 4.44 | .852 |  |
| %    | 100                                                                                                                                                      | .9   | 3.8 | 6.6  | 27.4 | 61.3 |      |      |      |  |

\*Frq.: Frequency; %: Percentage

## 5.B. Document Evaluation of the usefulness of AR according to sex.

| Sex                                                                                                                                                 | Total | Strongly disagree | Disagree | Neither disagree nor agree | Agree | Strongly agree | Md.  | M    | Sd.  |       |
|-----------------------------------------------------------------------------------------------------------------------------------------------------|-------|-------------------|----------|----------------------------|-------|----------------|------|------|------|-------|
| Teaching                                                                                                                                            |       |                   |          |                            |       |                |      |      |      |       |
| 1. AR allows teaching to happen via discovery                                                                                                       |       |                   |          |                            |       |                |      |      |      |       |
| Masc.                                                                                                                                               | Frq.  | 58                | 2        | 1                          | 6     | 16             | 33   | 5.00 | 4.33 | .980  |
|                                                                                                                                                     | %     | 100               | 3.4      | 1.7                        | 10.3  | 27.6           | 56.9 |      |      |       |
| Fem.                                                                                                                                                | Frq.  | 48                | 1        | 2                          | 2     | 13             | 30   | 5.00 | 4.44 | .920  |
|                                                                                                                                                     | %     | 100               | 2.1      | 4.2                        | 4.2   | 27.1           | 62.5 |      |      |       |
| 2. AR can be another way for the teacher to teach knowledge as well as using books and note taking                                                  |       |                   |          |                            |       |                |      |      |      |       |
| Masc.                                                                                                                                               | Frq.  | 58                | 0        | 0                          | 6     | 19             | 33   | 5.00 | 4.47 | .681  |
|                                                                                                                                                     | %     | 100               | 0        | 0                          | 10.3  | 32.8           | 56.9 |      |      |       |
| Fem.                                                                                                                                                | Frq.  | 48                | 1        | 0                          | 3     | 12             | 32   | 5.00 | 4.54 | .798  |
|                                                                                                                                                     | %     | 100               | 2.1      | 0                          | 6.3   | 25.0           | 66.7 |      |      |       |
| 3. Teachers can teach better if they also use AR in the classroom                                                                                   |       |                   |          |                            |       |                |      |      |      |       |
| Masc.                                                                                                                                               | Frq.  | 58                | 2        | 4                          | 6     | 25             | 21   | 4.00 | 4.02 | 1.034 |
|                                                                                                                                                     | %     | 100               | 3.4      | 6.9                        | 10.3  | 43.1           | 36.2 |      |      |       |
| Fem.                                                                                                                                                | Frq.  | 48                | 1        | 1                          | 5     | 23             | 18   | 4.00 | 4.17 | .859  |
|                                                                                                                                                     | %     | 100               | 2.1      | 2.1                        | 10.4  | 47.9           | 37.5 |      |      |       |
| 4. AR can be used by teachers to build knowledge adapted to each area                                                                               |       |                   |          |                            |       |                |      |      |      |       |
| Masc.                                                                                                                                               | Frq.  | 58                | 2        | 0                          | 8     | 22             | 26   | 4.00 | 4.21 | .932  |
|                                                                                                                                                     | %     | 100               | 3.4      | 0                          | 13.8  | 37.9           | 44.8 |      |      |       |
| Fem.                                                                                                                                                | Frq.  | 48                | 0        | 1                          | 5     | 16             | 26   | 5.00 | 4.40 | .765  |
|                                                                                                                                                     | %     | 100               | 0        | 2.1                        | 10.4  | 33.3           | 54.2 |      |      |       |
| Learning                                                                                                                                            |       |                   |          |                            |       |                |      |      |      |       |
| 5. AR can increase students' attention                                                                                                              |       |                   |          |                            |       |                |      |      |      |       |
| Masc.                                                                                                                                               | Frq.  | 58                | 4        | 1                          | 9     | 12             | 32   | 5.00 | 4.16 | 1.182 |
|                                                                                                                                                     | %     | 100               | 6.9      | 1.7                        | 15.5  | 20.7           | 55.2 |      |      |       |
| Fem.                                                                                                                                                | Frq.  | 48                | 1        | 1                          | 3     | 27             | 16   | 4.00 | 4.17 | .808  |
|                                                                                                                                                     | %     | 100               | 2.1      | 2.1                        | 6.3   | 56.3           | 33.3 |      |      |       |
| 6. AR can increase students' motivation                                                                                                             |       |                   |          |                            |       |                |      |      |      |       |
| Masc.                                                                                                                                               | Frq.  | 58                | 4        | 5                          | 5     | 12             | 32   | 5.00 | 4.09 | 1.274 |
|                                                                                                                                                     | %     | 100               | 6.9      | 8.6                        | 8.6   | 20.7           | 55.2 |      |      |       |
| Fem.                                                                                                                                                | Frq.  | 48                | 0        | 1                          | 3     | 18             | 26   | 5.00 | 4.44 | .712  |
|                                                                                                                                                     | %     | 100               | 0        | 2.1                        | 6.3   | 37.5           | 54.2 |      |      |       |
| 7. AR helps students to understand the contents better                                                                                              |       |                   |          |                            |       |                |      |      |      |       |
| Masc.                                                                                                                                               | Frq.  | 58                | 3        | 4                          | 7     | 22             | 22   | 4.00 | 3.97 | 1.123 |
|                                                                                                                                                     | %     | 100               | 5.2      | 6.9                        | 12.1  | 37.9           | 37.9 |      |      |       |
| Fem.                                                                                                                                                | Frq.  | 48                | 1        | 4                          | 6     | 16             | 21   | 4.00 | 4.08 | 1.048 |
|                                                                                                                                                     | %     | 100               | 2.1      | 8.3                        | 12.5  | 33.3           | 43.8 |      |      |       |
| 8. Activities using AR encourage students to participate more in class                                                                              |       |                   |          |                            |       |                |      |      |      |       |
| Masc.                                                                                                                                               | Frq.  | 58                | 5        | 5                          | 6     | 21             | 21   | 4.00 | 3.83 | 1.258 |
|                                                                                                                                                     | %     | 100               | 8.6      | 8.6                        | 10.3  | 36.2           | 36.2 |      |      |       |
| Fem.                                                                                                                                                | Frq.  | 48                | 1        | 1                          | 6     | 22             | 18   | 4.00 | 4.15 | .875  |
|                                                                                                                                                     | %     | 100               | 2.1      | 2.1                        | 12.5  | 45.8           | 37.5 |      |      |       |
| 9. AR can help students to work in collaboration                                                                                                    |       |                   |          |                            |       |                |      |      |      |       |
| Masc.                                                                                                                                               | Frq.  | 58                | 0        | 4                          | 8     | 22             | 24   | 4.00 | 4.14 | .907  |
|                                                                                                                                                     | %     | 100               | 0        | 6.9                        | 13.8  | 37.9           | 41.4 |      |      |       |
| Fem.                                                                                                                                                | Frq.  | 48                | 0        | 0                          | 12    | 20             | 16   | 4.00 | 4.08 | .767  |
|                                                                                                                                                     | %     | 100               | 0        | 0                          | 25.0  | 41.7           | 33.3 |      |      |       |
| 10. AR can improve the quality of students' learning and studying                                                                                   |       |                   |          |                            |       |                |      |      |      |       |
| Masc.                                                                                                                                               | Frq.  | 58                | 2        | 3                          | 9     | 16             | 28   | 4.00 | 4.12 | 1.077 |
|                                                                                                                                                     | %     | 100               | 3.4      | 5.2                        | 15.5  | 27.6           | 48.3 |      |      |       |
| Fem.                                                                                                                                                | Frq.  | 48                | 2        | 0                          | 9     | 16             | 21   | 4.00 | 4.13 | 1.003 |
|                                                                                                                                                     | %     | 100               | 4.2      | 0                          | 18.8  | 33.3           | 43.8 |      |      |       |
| Spanish Language and Literature                                                                                                                     |       |                   |          |                            |       |                |      |      |      |       |
| 11. The AR activity has enabled me to distinguish between descriptive, argumentative, narrative, instructive and literary texts as reading material |       |                   |          |                            |       |                |      |      |      |       |
| Masc.                                                                                                                                               | Frq.  | 58                | 1        | 1                          | 11    | 29             | 16   | 4.00 | 4.00 | .838  |
|                                                                                                                                                     | %     | 100               | 1.7      | 1.7                        | 19.0  | 50.0           | 27.6 |      |      |       |
| Fem.                                                                                                                                                | Frq.  | 48                | 0        | 1                          | 10    | 22             | 15   | 4.00 | 4.06 | .783  |
|                                                                                                                                                     | %     | 100               | 0        | 2.1                        | 20.8  | 45.8           | 31.3 |      |      |       |
| 12. The AR activity included access to a wealth of texts to foster reading habits and comprehension, as well as activities for its evaluation       |       |                   |          |                            |       |                |      |      |      |       |
| Masc.                                                                                                                                               | Frq.  | 58                | 0        | 1                          | 3     | 30             | 24   | 4.00 | 4.33 | .659  |
|                                                                                                                                                     | %     | 100               | 0        | 1.7                        | 5.2   | 51.7           | 41.4 |      |      |       |
| Fem.                                                                                                                                                | Frq.  | 48                | 0        | 0                          | 8     | 23             | 17   | 4.00 | 4.19 | .704  |
|                                                                                                                                                     | %     | 100               | 0        | 0                          | 16.7  | 47.9           | 35.4 |      |      |       |

|                                                                                                                                               |      |     |     |     |      |      |      |      |      |       |
|-----------------------------------------------------------------------------------------------------------------------------------------------|------|-----|-----|-----|------|------|------|------|------|-------|
| 13. The AR video has shown me another way to look at reading, based on journalistic and advertising texts                                     |      |     |     |     |      |      |      |      |      |       |
| Masc.                                                                                                                                         | Frq. | 58  | 0   | 2   | 8    | 17   | 31   | 5.00 | 4.33 | .846  |
|                                                                                                                                               | %    | 100 | 0   | 3.4 | 13.8 | 29.3 | 53.4 |      |      |       |
| Fem.                                                                                                                                          | Frq. | 48  | 1   | 0   | 5    | 25   | 17   | 4.00 | 4.19 | .790  |
|                                                                                                                                               | %    | 100 | 2.1 | 0   | 10.4 | 52.1 | 35.4 |      |      |       |
| 14. The AR activity has enabled me to distinguish between information, opinion and advertising concepts in journalistic and advertising texts |      |     |     |     |      |      |      |      |      |       |
| Masc.                                                                                                                                         | Frq. | 58  | 2   | 3   | 10   | 18   | 25   | 4.00 | 4.05 | 1.067 |
|                                                                                                                                               | %    | 100 | 3.4 | 5.2 | 17.2 | 31.0 | 43.1 |      |      |       |
| Fem.                                                                                                                                          | Frq. | 48  | 0   | 2   | 11   | 24   | 11   | 4.00 | 3.92 | .794  |
|                                                                                                                                               | %    | 100 | 0   | 4.2 | 22.9 | 50.0 | 22.9 |      |      |       |
| 15. The proposal has given me access to reading comprehension strategies for texts, e.g., dictionary use                                      |      |     |     |     |      |      |      |      |      |       |
| Masc.                                                                                                                                         | Frq. | 58  | 3   | 4   | 3    | 25   | 23   | 4.00 | 4.05 | 1.099 |
|                                                                                                                                               | %    | 100 | 5.2 | 6.9 | 5.2  | 43.1 | 39.7 |      |      |       |
| Fem.                                                                                                                                          | Frq. | 48  | 0   | 2   | 9    | 16   | 21   | 4.00 | 4.17 | .883  |
|                                                                                                                                               | %    | 100 | 0   | 4.2 | 18.8 | 33.3 | 43.8 |      |      |       |
| 16. Using AR to learn these types of curricular contents seems useful to me                                                                   |      |     |     |     |      |      |      |      |      |       |
| Masc.                                                                                                                                         | Frq. | 58  | 0   | 3   | 6    | 13   | 36   | 5.00 | 4.41 | .879  |
|                                                                                                                                               | %    | 100 | 0   | 5.2 | 10.3 | 22.4 | 62.1 |      |      |       |
| Fem.                                                                                                                                          | Frq. | 48  | 0   | 0   | 5    | 14   | 29   | 5.00 | 4.50 | .684  |
|                                                                                                                                               | %    | 100 | 0   | 0   | 10.4 | 29.2 | 60.4 |      |      |       |

#### First Foreign Language

|                                                                                                                       |      |     |     |     |      |      |      |      |      |       |
|-----------------------------------------------------------------------------------------------------------------------|------|-----|-----|-----|------|------|------|------|------|-------|
| 17. The AR activity has allowed me to work on the subject of peace and solidarity in the world                        |      |     |     |     |      |      |      |      |      |       |
| Masc.                                                                                                                 | Frq. | 58  | 2   | 3   | 14   | 19   | 20   | 4.00 | 3.90 | 1.054 |
|                                                                                                                       | %    | 100 | 3.4 | 5.2 | 24.1 | 32.8 | 34.5 |      |      |       |
| Fem.                                                                                                                  | Frq. | 48  | 0   | 1   | 6    | 20   | 21   | 4.00 | 4.27 | .765  |
|                                                                                                                       | %    | 100 | 0   | 2.1 | 12.5 | 41.7 | 43.8 |      |      |       |
| 18. The AR video shows simple narratives in the present and future to work on understanding                           |      |     |     |     |      |      |      |      |      |       |
| Masc.                                                                                                                 | Frq. | 58  | 0   | 2   | 4    | 26   | 26   | 4.00 | 4.31 | .754  |
|                                                                                                                       | %    | 100 | 0   | 3.4 | 6.9  | 44.8 | 44.8 |      |      |       |
| Fem.                                                                                                                  | Frq. | 48  | 0   | 0   | 9    | 23   | 16   | 4.00 | 4.15 | .714  |
|                                                                                                                       | %    | 100 | 0   | 0   | 18.8 | 47.9 | 33.3 |      |      |       |
| 19. The activity included quick strategies for understanding texts, e.g., the AR translator                           |      |     |     |     |      |      |      |      |      |       |
| Masc.                                                                                                                 | Frq. | 58  | 0   | 1   | 2    | 23   | 32   | 5.00 | 4.48 | .655  |
|                                                                                                                       | %    | 100 | 0   | 1.7 | 3.4  | 39.7 | 55.2 |      |      |       |
| Fem.                                                                                                                  | Frq. | 48  | 0   | 1   | 9    | 14   | 24   | 4.50 | 4.27 | .844  |
|                                                                                                                       | %    | 100 | 0   | 2.1 | 18.8 | 29.2 | 50.0 |      |      |       |
| 20. The strip of images enabled me to use AR to work on nouns, pronouns, articles and demonstratives as area contents |      |     |     |     |      |      |      |      |      |       |
| Masc.                                                                                                                 | Frq. | 58  | 3   | 4   | 11   | 17   | 23   | 4.00 | 3.91 | 1.159 |
|                                                                                                                       | %    | 100 | 5.2 | 6.9 | 19.0 | 29.3 | 39.7 |      |      |       |
| Fem.                                                                                                                  | Frq. | 48  | 2   | 1   | 12   | 15   | 18   | 4.00 | 3.96 | 1.051 |
|                                                                                                                       | %    | 100 | 4.2 | 2.1 | 25.0 | 31.3 | 37.5 |      |      |       |
| 21. The AR practical proposal included a blog to work with the subject through assessment activities                  |      |     |     |     |      |      |      |      |      |       |
| Masc.                                                                                                                 | Frq. | 58  | 1   | 5   | 6    | 20   | 26   | 4.00 | 4.12 | 1.027 |
|                                                                                                                       | %    | 100 | 1.7 | 8.6 | 10.3 | 34.5 | 44.8 |      |      |       |
| Fem.                                                                                                                  | Frq. | 48  | 0   | 0   | 13   | 22   | 13   | 4.00 | 4.00 | .744  |
|                                                                                                                       | %    | 100 | 0   | 0   | 27.1 | 45.8 | 27.1 |      |      |       |
| 22. Using AR to learn these types of curricular contents seems useful to me                                           |      |     |     |     |      |      |      |      |      |       |
| Masc.                                                                                                                 | Frq. | 58  | 0   | 4   | 5    | 19   | 30   | 5.00 | 4.29 | .899  |
|                                                                                                                       | %    | 100 | 0   | 6.9 | 8.6  | 32.8 | 51.7 |      |      |       |
| Fem.                                                                                                                  | Frq. | 48  | 1   | 0   | 6    | 12   | 29   | 5.00 | 4.42 | .871  |
|                                                                                                                       | %    | 100 | 2.1 | 0   | 12.5 | 25.0 | 60.4 |      |      |       |

#### Social Sciences

|                                                                                                 |      |     |     |     |      |      |      |      |      |       |
|-------------------------------------------------------------------------------------------------|------|-----|-----|-----|------|------|------|------|------|-------|
| 23. The AR activity enabled me to discover some of Spain's cultural heritage monuments          |      |     |     |     |      |      |      |      |      |       |
| Masc.                                                                                           | Frq. | 58  | 0   | 0   | 2    | 10   | 46   | 5.00 | 4.76 | .506  |
|                                                                                                 | %    | 100 | 0   | 0   | 3.4  | 17.2 | 79.3 |      |      |       |
| Fem.                                                                                            | Frq. | 48  | 0   | 2   | 1    | 16   | 29   | 5.00 | 4.50 | .744  |
|                                                                                                 | %    | 100 | 0   | 4.2 | 2.1  | 33.3 | 60.4 |      |      |       |
| 24. From what I saw in the video, Europe seems to be a continent with many resources            |      |     |     |     |      |      |      |      |      |       |
| Masc.                                                                                           | Frq. | 58  | 2   | 3   | 7    | 19   | 27   | 4.00 | 4.14 | 1.050 |
|                                                                                                 | %    | 100 | 3.4 | 5.2 | 12.1 | 32.8 | 46.6 |      |      |       |
| Fem.                                                                                            | Frq. | 48  | 0   | 3   | 5    | 24   | 16   | 4.00 | 4.10 | .831  |
|                                                                                                 | %    | 100 | 0   | 6.3 | 10.4 | 50.0 | 33.3 |      |      |       |
| 25. The AR activity has helped me to understand the European Union and its main aims and values |      |     |     |     |      |      |      |      |      |       |
| Masc.                                                                                           | Frq. | 58  | 2   | 1   | 10   | 19   | 26   | 4.00 | 4.14 | .999  |
|                                                                                                 | %    | 100 | 3.4 | 1.7 | 17.2 | 32.8 | 44.8 |      |      |       |
| Fem.                                                                                            | Frq. | 48  | 0   | 0   | 13   | 17   | 18   | 4.00 | 4.10 | .805  |
|                                                                                                 | %    | 100 | 0   | 0   | 27.1 | 35.4 | 37.5 |      |      |       |
| 26. The AR activity has helped me to learn the EU member countries and their capitals           |      |     |     |     |      |      |      |      |      |       |
| Masc.                                                                                           | Frq. | 58  | 3   | 3   | 9    | 15   | 28   | 4.00 | 4.07 | 1.153 |
|                                                                                                 | %    | 100 | 5.2 | 5.2 | 15.5 | 25.9 | 48.3 |      |      |       |
| Fem.                                                                                            | Frq. | 48  | 0   | 1   | 3    | 22   | 22   | 4.00 | 4.35 | .699  |
|                                                                                                 | %    | 100 | 0   | 2.1 | 6.3  | 45.8 | 45.8 |      |      |       |



|                                                                                                                               |      |     |     |      |      |      |      |      |      |       |
|-------------------------------------------------------------------------------------------------------------------------------|------|-----|-----|------|------|------|------|------|------|-------|
| 27. The strip of images in AR showed information about EU institutions, government bodies and symbols in a more enjoyable way |      |     |     |      |      |      |      |      |      |       |
| Masc.                                                                                                                         | Frq. | 58  | 1   | 6    | 7    | 21   | 23   | 4.00 | 4.02 | 1.051 |
|                                                                                                                               | %    | 100 | 1.7 | 10.3 | 12.1 | 36.2 | 39.7 |      |      |       |
| Fem.                                                                                                                          | Frq. | 48  | 0   | 2    | 5    | 15   | 26   | 5.00 | 4.35 | .838  |
|                                                                                                                               | %    | 100 | 0   | 4.2  | 10.4 | 31.3 | 54.2 |      |      |       |
| 28. Using AR to learn these types of curricular contents seems useful to me                                                   |      |     |     |      |      |      |      |      |      |       |
| Masc.                                                                                                                         | Frq. | 58  | 2   | 3    | 3    | 15   | 35   | 5.00 | 4.34 | 1.035 |
|                                                                                                                               | %    | 100 | 3.4 | 5.2  | 5.2  | 25.9 | 60.3 |      |      |       |
| Fem.                                                                                                                          | Frq. | 48  | 0   | 1    | 8    | 13   | 26   | 5.00 | 4.33 | .834  |
|                                                                                                                               | %    | 100 | 0   | 2.1  | 16.7 | 27.1 | 54.2 |      |      |       |

#### Natural Sciences

|                                                                                                                                                     |      |     |      |      |      |      |      |      |      |      |
|-----------------------------------------------------------------------------------------------------------------------------------------------------|------|-----|------|------|------|------|------|------|------|------|
| 29. The AR activity taught me about drugs and their main negative effects for health                                                                |      |     |      |      |      |      |      |      |      |      |
| Masc.                                                                                                                                               | Frq. | 58  | 1    | 0    | 9    | 7    | 41   | 5.00 | 4.50 | .884 |
|                                                                                                                                                     | %    | 100 | 1.7  | 0    | 15.5 | 12.1 | 70.7 |      |      |      |
| Fem.                                                                                                                                                | Frq. | 48  | 0    | 1    | 5    | 10   | 32   | 5.00 | 4.52 | .772 |
|                                                                                                                                                     | %    | 100 | 0    | 2.1  | 10.4 | 20.8 | 66.7 |      |      |      |
| 30. The AR video has dealt with decision making related to consequences of acting good or bad                                                       |      |     |      |      |      |      |      |      |      |      |
| Masc.                                                                                                                                               | Frq. | 58  | 1    | 1    | 7    | 11   | 38   | 5.00 | 4.45 | .902 |
|                                                                                                                                                     | %    | 100 | 1.7  | 1.7  | 12.1 | 19.0 | 65.5 |      |      |      |
| Fem.                                                                                                                                                | Frq. | 48  | 0    | 1    | 1    | 17   | 29   | 5.00 | 4.54 | .651 |
|                                                                                                                                                     | %    | 100 | 0    | 2.1  | 2.1  | 35.4 | 60.4 |      |      |      |
| 31. The strip of images helped me to learn of the importance of raising awareness about alcohol, tobacco and drugs and preventing their consumption |      |     |      |      |      |      |      |      |      |      |
| Masc.                                                                                                                                               | Frq. | 58  | 0    | 2    | 5    | 19   | 32   | 5.00 | 4.40 | .793 |
|                                                                                                                                                     | %    | 100 | 0    | 3.4  | 8.6  | 32.8 | 55.2 |      |      |      |
| Fem.                                                                                                                                                | Frq. | 48  | 0    | 1    | 3    | 14   | 30   | 5.00 | 4.52 | .714 |
|                                                                                                                                                     | %    | 100 | 0    | 2.1  | 6.3  | 29.2 | 62.5 |      |      |      |
| 32. This AR activity showed me responsible behaviors regarding healthy life practices, diet and proper functioning of the body                      |      |     |      |      |      |      |      |      |      |      |
| Masc.                                                                                                                                               | Frq. | 58  | 0    | 0    | 9    | 20   | 29   | 4.50 | 4.34 | .739 |
|                                                                                                                                                     | %    | 100 | 0    | 0    | 15.5 | 34.5 | 50.0 |      |      |      |
| Fem.                                                                                                                                                | Frq. | 48  | 0    | 1    | 0    | 15   | 32   | 5.00 | 4.63 | .606 |
|                                                                                                                                                     | %    | 100 | 0    | 2.1  | 0    | 31.3 | 66.7 |      |      |      |
| 33. The AR session did not address concepts or give an explanation of harmful effects or decision making                                            |      |     |      |      |      |      |      |      |      |      |
| Masc.                                                                                                                                               | Frq. | 58  | 52   | 5    | 1    | 0    | 0    | 1.00 | 1.12 | .378 |
|                                                                                                                                                     | %    | 100 | 89.7 | 8.6  | 1.7  | 0    | 0    |      |      |      |
| Fem.                                                                                                                                                | Frq. | 48  | 40   | 5    | 3    | 0    | 0    | 1.00 | 1.23 | .555 |
|                                                                                                                                                     | %    | 100 | 83.3 | 10.4 | 6.3  | 0    | 0    |      |      |      |
| 34. Using AR to learn these types of curricular contents seems useful to me                                                                         |      |     |      |      |      |      |      |      |      |      |
| Masc.                                                                                                                                               | Frq. | 58  | 1    | 1    | 1    | 11   | 44   | 5.00 | 4.66 | .762 |
|                                                                                                                                                     | %    | 100 | 1.7  | 1.7  | 1.7  | 19.0 | 75.9 |      |      |      |
| Fem.                                                                                                                                                | Frq. | 48  | 0    | 0    | 2    | 14   | 32   | 5.00 | 4.63 | .570 |
|                                                                                                                                                     | %    | 100 | 0    | 0    | 4.2  | 29.2 | 66.7 |      |      |      |

#### Mathematics

|                                                                                                                                                              |      |     |      |     |      |      |      |      |      |       |
|--------------------------------------------------------------------------------------------------------------------------------------------------------------|------|-----|------|-----|------|------|------|------|------|-------|
| 35. This AR activity has enabled me to learn about or revise fractions and their terms                                                                       |      |     |      |     |      |      |      |      |      |       |
| Masc.                                                                                                                                                        | Frq. | 58  | 1    | 2   | 5    | 16   | 34   | 5.00 | 4.38 | .914  |
|                                                                                                                                                              | %    | 100 | 1.7  | 3.4 | 8.6  | 27.6 | 58.6 |      |      |       |
| Fem.                                                                                                                                                         | Frq. | 48  | 1    | 0   | 6    | 16   | 25   | 5.00 | 4.33 | .859  |
|                                                                                                                                                              | %    | 100 | 2.1  | 0   | 12.5 | 33.3 | 52.1 |      |      |       |
| 36. The AR video showed me graphical representations of fractions which were easy to read and understand                                                     |      |     |      |     |      |      |      |      |      |       |
| Masc.                                                                                                                                                        | Frq. | 58  | 0    | 1   | 3    | 16   | 38   | 5.00 | 4.57 | .678  |
|                                                                                                                                                              | %    | 100 | 0    | 1.7 | 5.2  | 27.6 | 65.5 |      |      |       |
| Fem.                                                                                                                                                         | Frq. | 48  | 0    | 1   | 2    | 21   | 24   | 4.50 | 4.42 | .679  |
|                                                                                                                                                              | %    | 100 | 0    | 2.1 | 4.2  | 43.8 | 50.0 |      |      |       |
| 37. It has been explained to me, using the AR activity, how to order simple fractions, calculate the fraction of a number and work with equivalent fractions |      |     |      |     |      |      |      |      |      |       |
| Masc.                                                                                                                                                        | Frq. | 58  | 2    | 0   | 5    | 23   | 28   | 4.00 | 4.29 | .899  |
|                                                                                                                                                              | %    | 100 | 3.4  | 0   | 8.6  | 39.7 | 48.3 |      |      |       |
| Fem.                                                                                                                                                         | Frq. | 48  | 2    | 2   | 3    | 16   | 25   | 5.00 | 4.25 | 1.042 |
|                                                                                                                                                              | %    | 100 | 4.2  | 4.2 | 6.3  | 33.3 | 52.1 |      |      |       |
| 38. The AR activity has enabled me to access a variety of contents related to fractions and also some self-assessment exercises                              |      |     |      |     |      |      |      |      |      |       |
| Masc.                                                                                                                                                        | Frq. | 58  | 0    | 2   | 4    | 17   | 35   | 5.00 | 4.47 | .777  |
|                                                                                                                                                              | %    | 100 | 0    | 3.4 | 6.9  | 29.3 | 60.3 |      |      |       |
| Fem.                                                                                                                                                         | Frq. | 48  | 0    | 1   | 3    | 15   | 29   | 5.00 | 4.50 | .715  |
|                                                                                                                                                              | %    | 100 | 0    | 2.1 | 6.3  | 31.3 | 60.4 |      |      |       |
| 39. The AR session did not address concepts or give an explanation of fractions                                                                              |      |     |      |     |      |      |      |      |      |       |
| Masc.                                                                                                                                                        | Frq. | 58  | 54   | 4   | 0    | 0    | 0    | 1.00 | 1.07 | .256  |
|                                                                                                                                                              | %    | 100 | 93.1 | 6.9 | 0    | 0    | 0    |      |      |       |
| Fem.                                                                                                                                                         | Frq. | 48  | 44   | 4   | 0    | 0    | 0    | 1.00 | 1.08 | .279  |
|                                                                                                                                                              | %    | 100 | 91.7 | 8.3 | 0    | 0    | 0    |      |      |       |
| 40. Using AR to learn these types of curricular contents seems useful to me                                                                                  |      |     |      |     |      |      |      |      |      |       |
| Masc.                                                                                                                                                        | Frq. | 58  | 1    | 3   | 4    | 15   | 35   | 5.00 | 4.38 | .952  |
|                                                                                                                                                              | %    | 100 | 1.7  | 5.2 | 6.9  | 25.9 | 60.3 |      |      |       |
| Fem.                                                                                                                                                         | Frq. | 48  | 0    | 1   | 3    | 14   | 30   | 5.00 | 4.52 | .714  |
|                                                                                                                                                              | %    | 100 | 0    | 2.1 | 6.3  | 29.2 | 62.5 |      |      |       |

\*Frq.: Frequency; %: Percentage
